# Supplementary material
Source: publisher site journal article supplement (https://www.dovepress.com/article/343468)
Supplement: Supplementary file 1 [file get_supplementary_file.php]

Supplementary figure 1 A

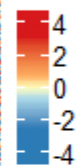

**Diagnosis**

- CD
- Healthy control

**Inflammation**

- Inflamed
- Non-inflamed

**Location**

- Terminal ileum
- Proximal colon
- Distal colon
- Rectum

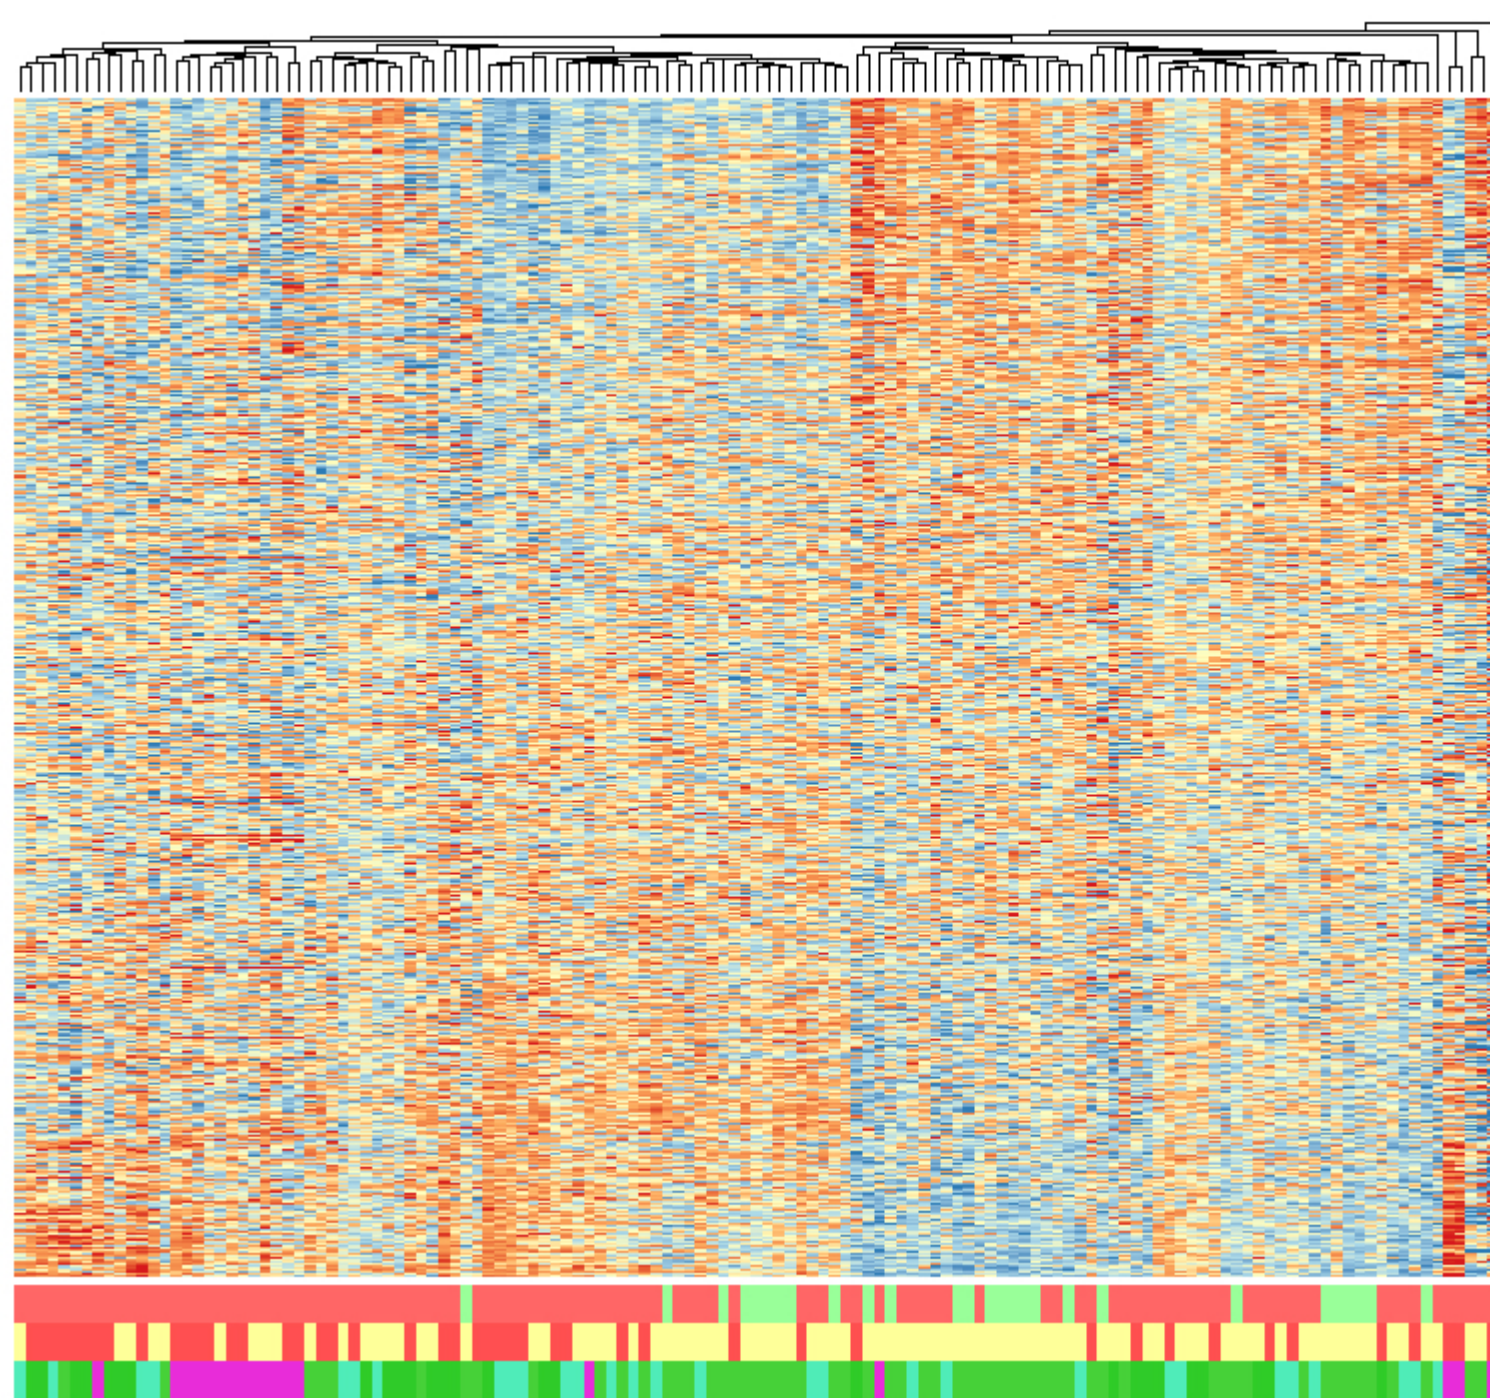



Supplementary figure 1 B

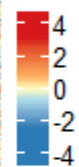

**Diagnosis**

- UC
- Healthy control

**Inflammation**

- Inflamed
- Non-inflamed

**Location**

- Terminal ileum
- Proximal colon
- Distal colon
- Rectum

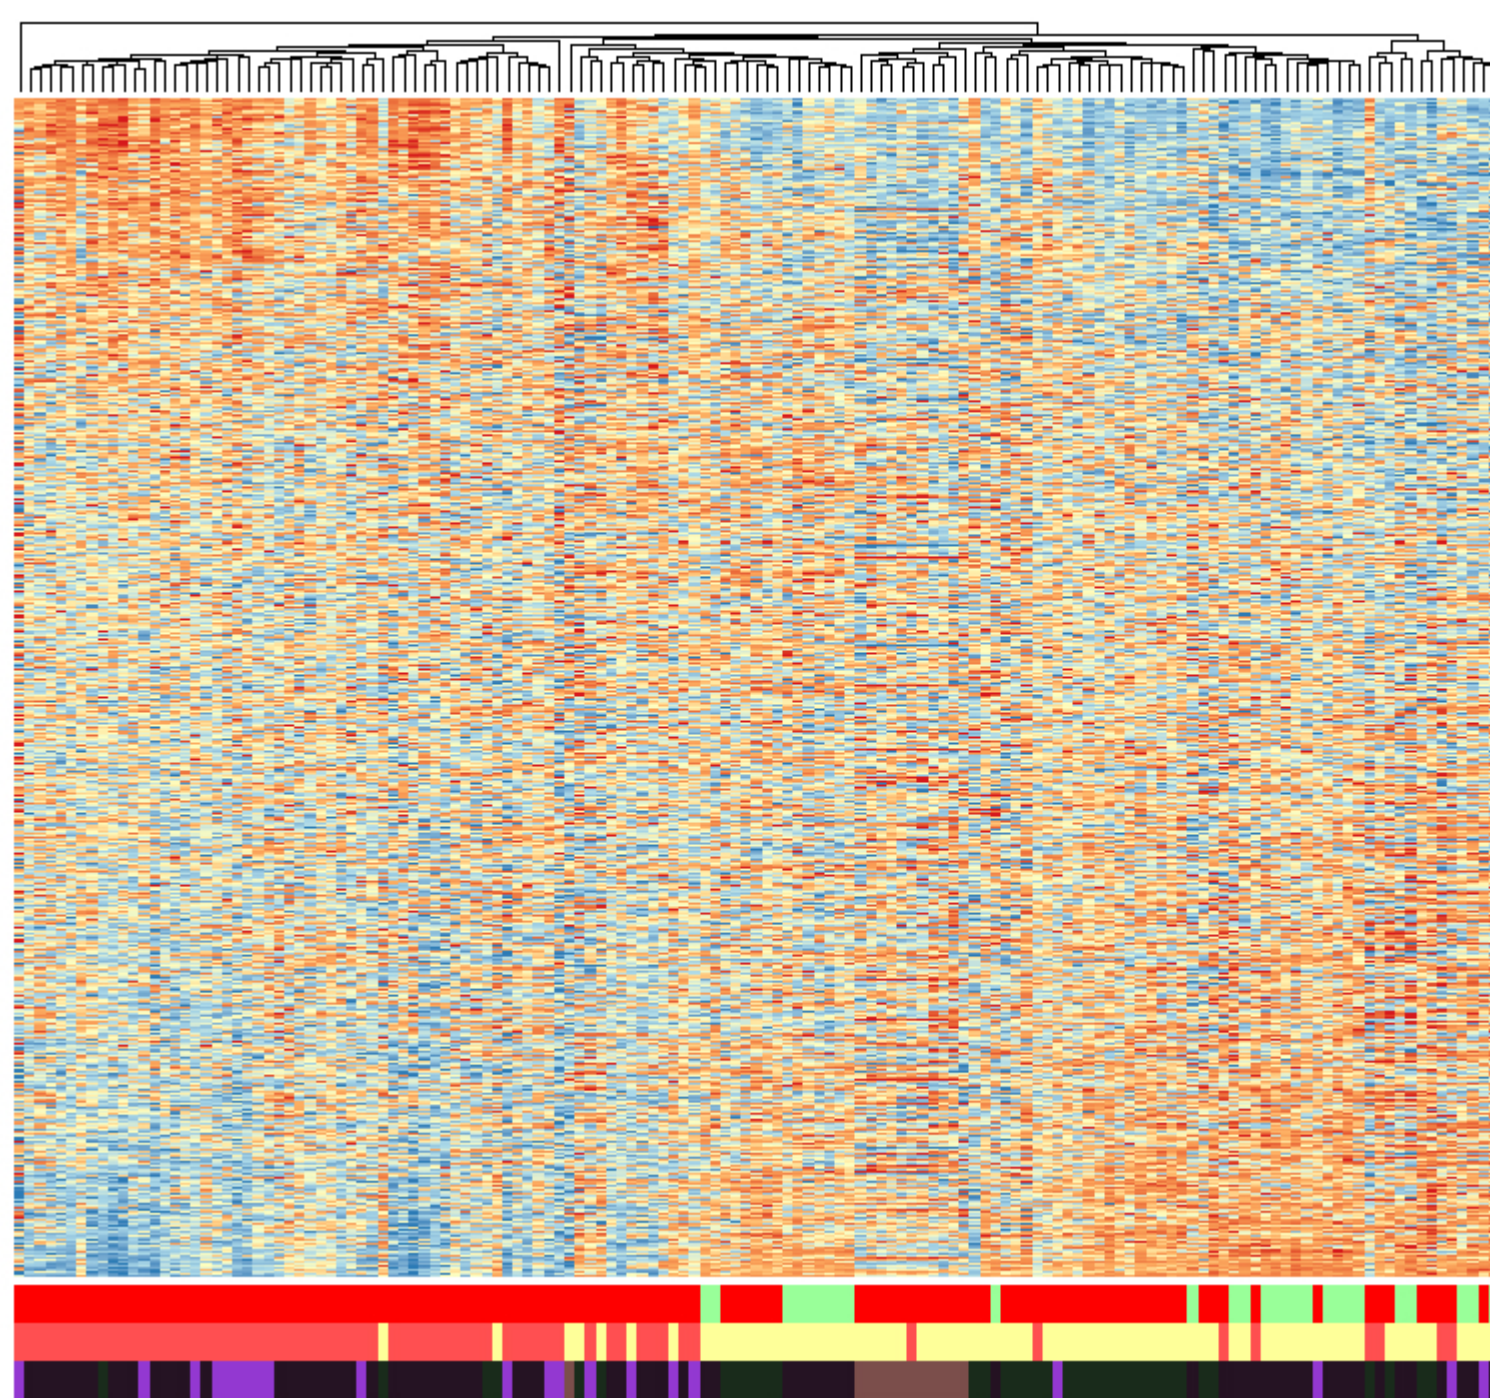

# Supplementary figure 2

A

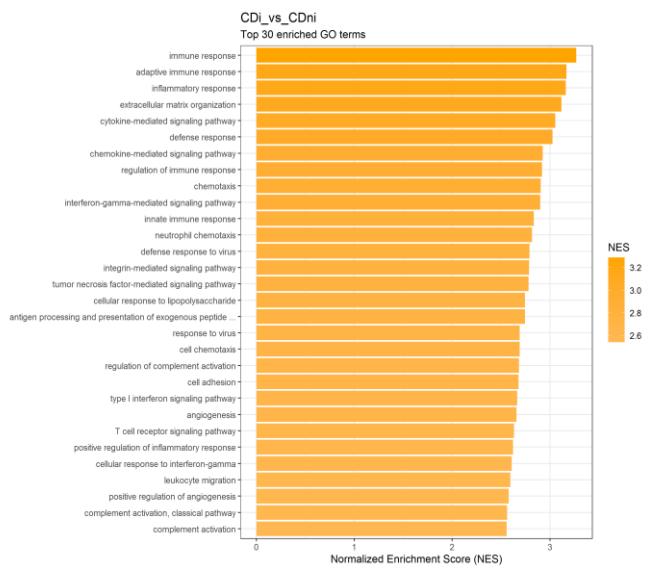

B

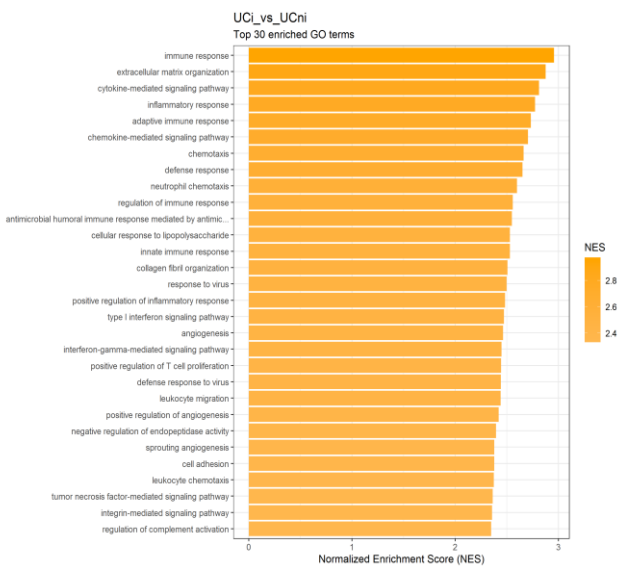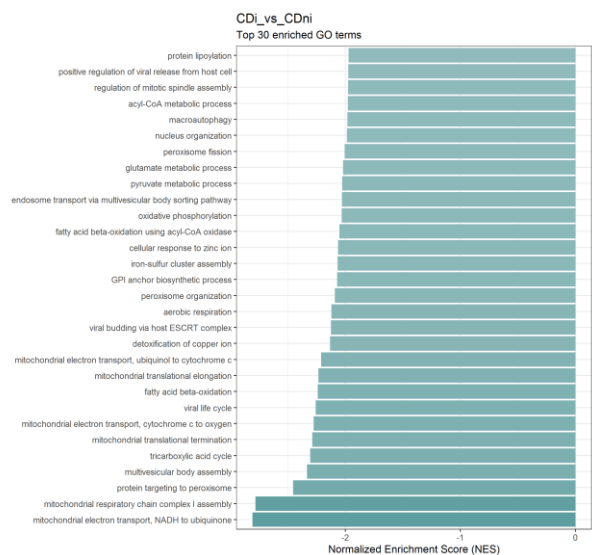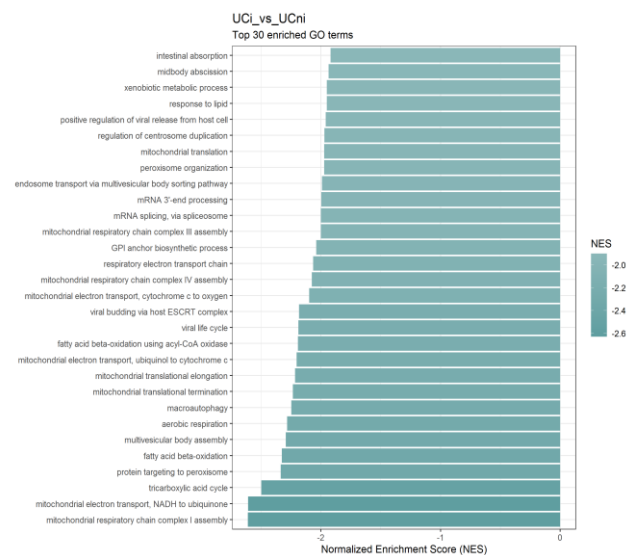

# Supplementary figure 3

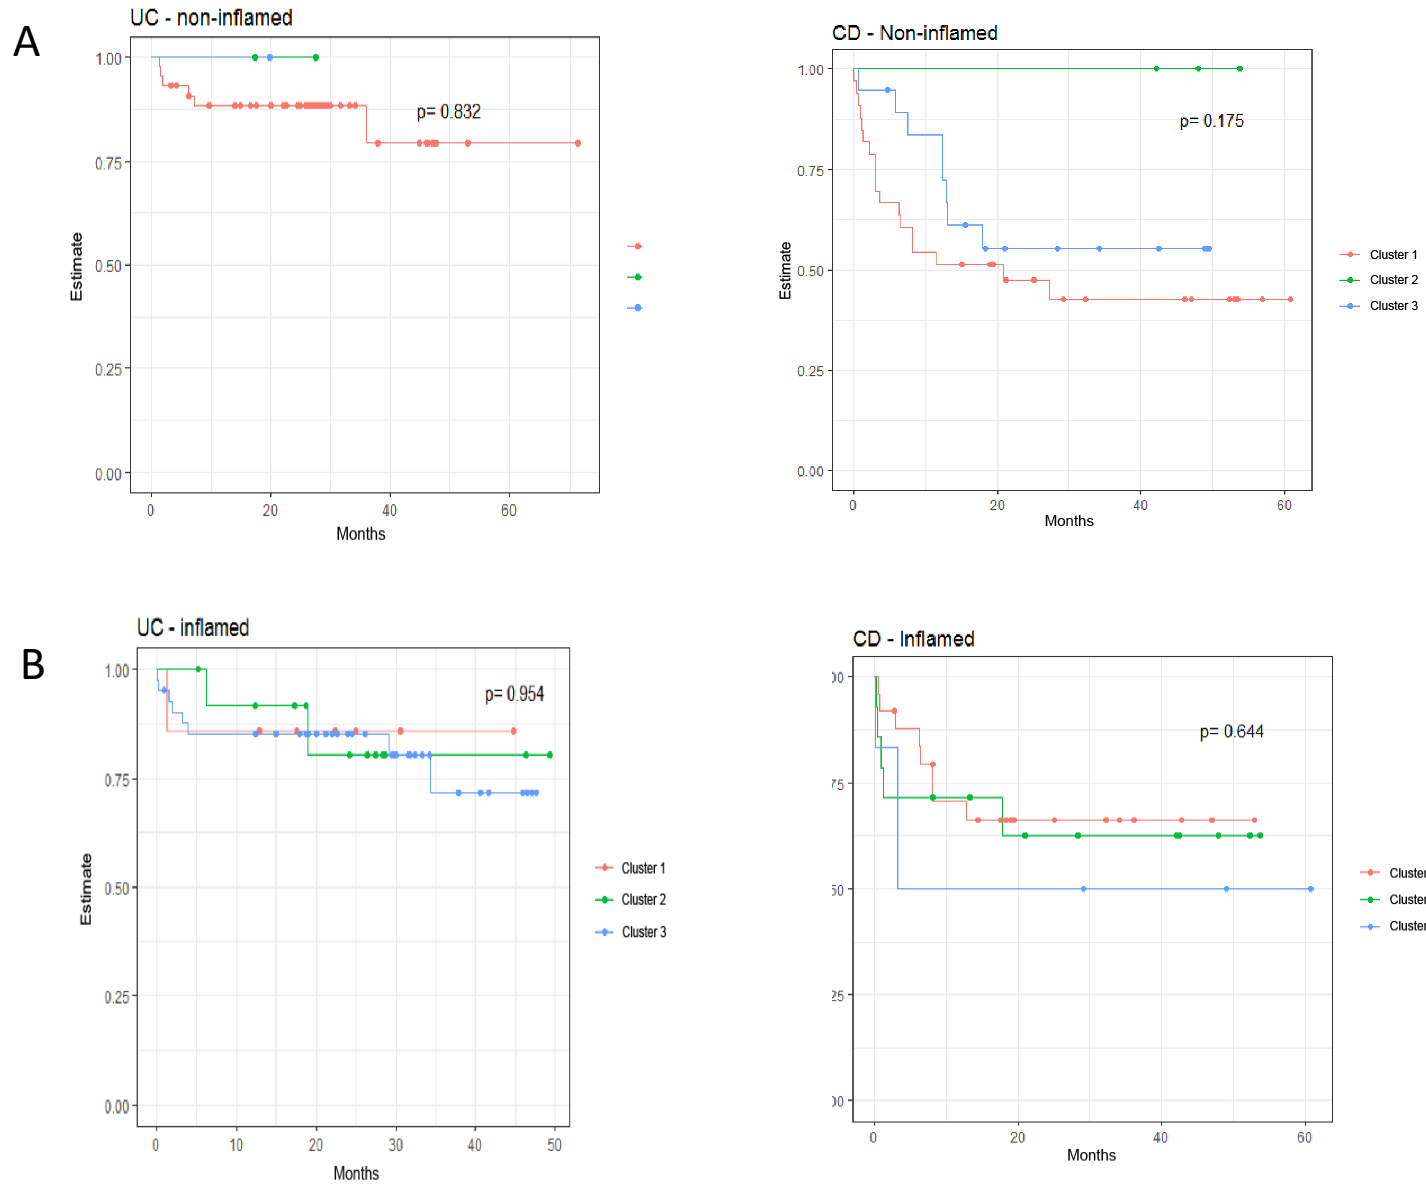



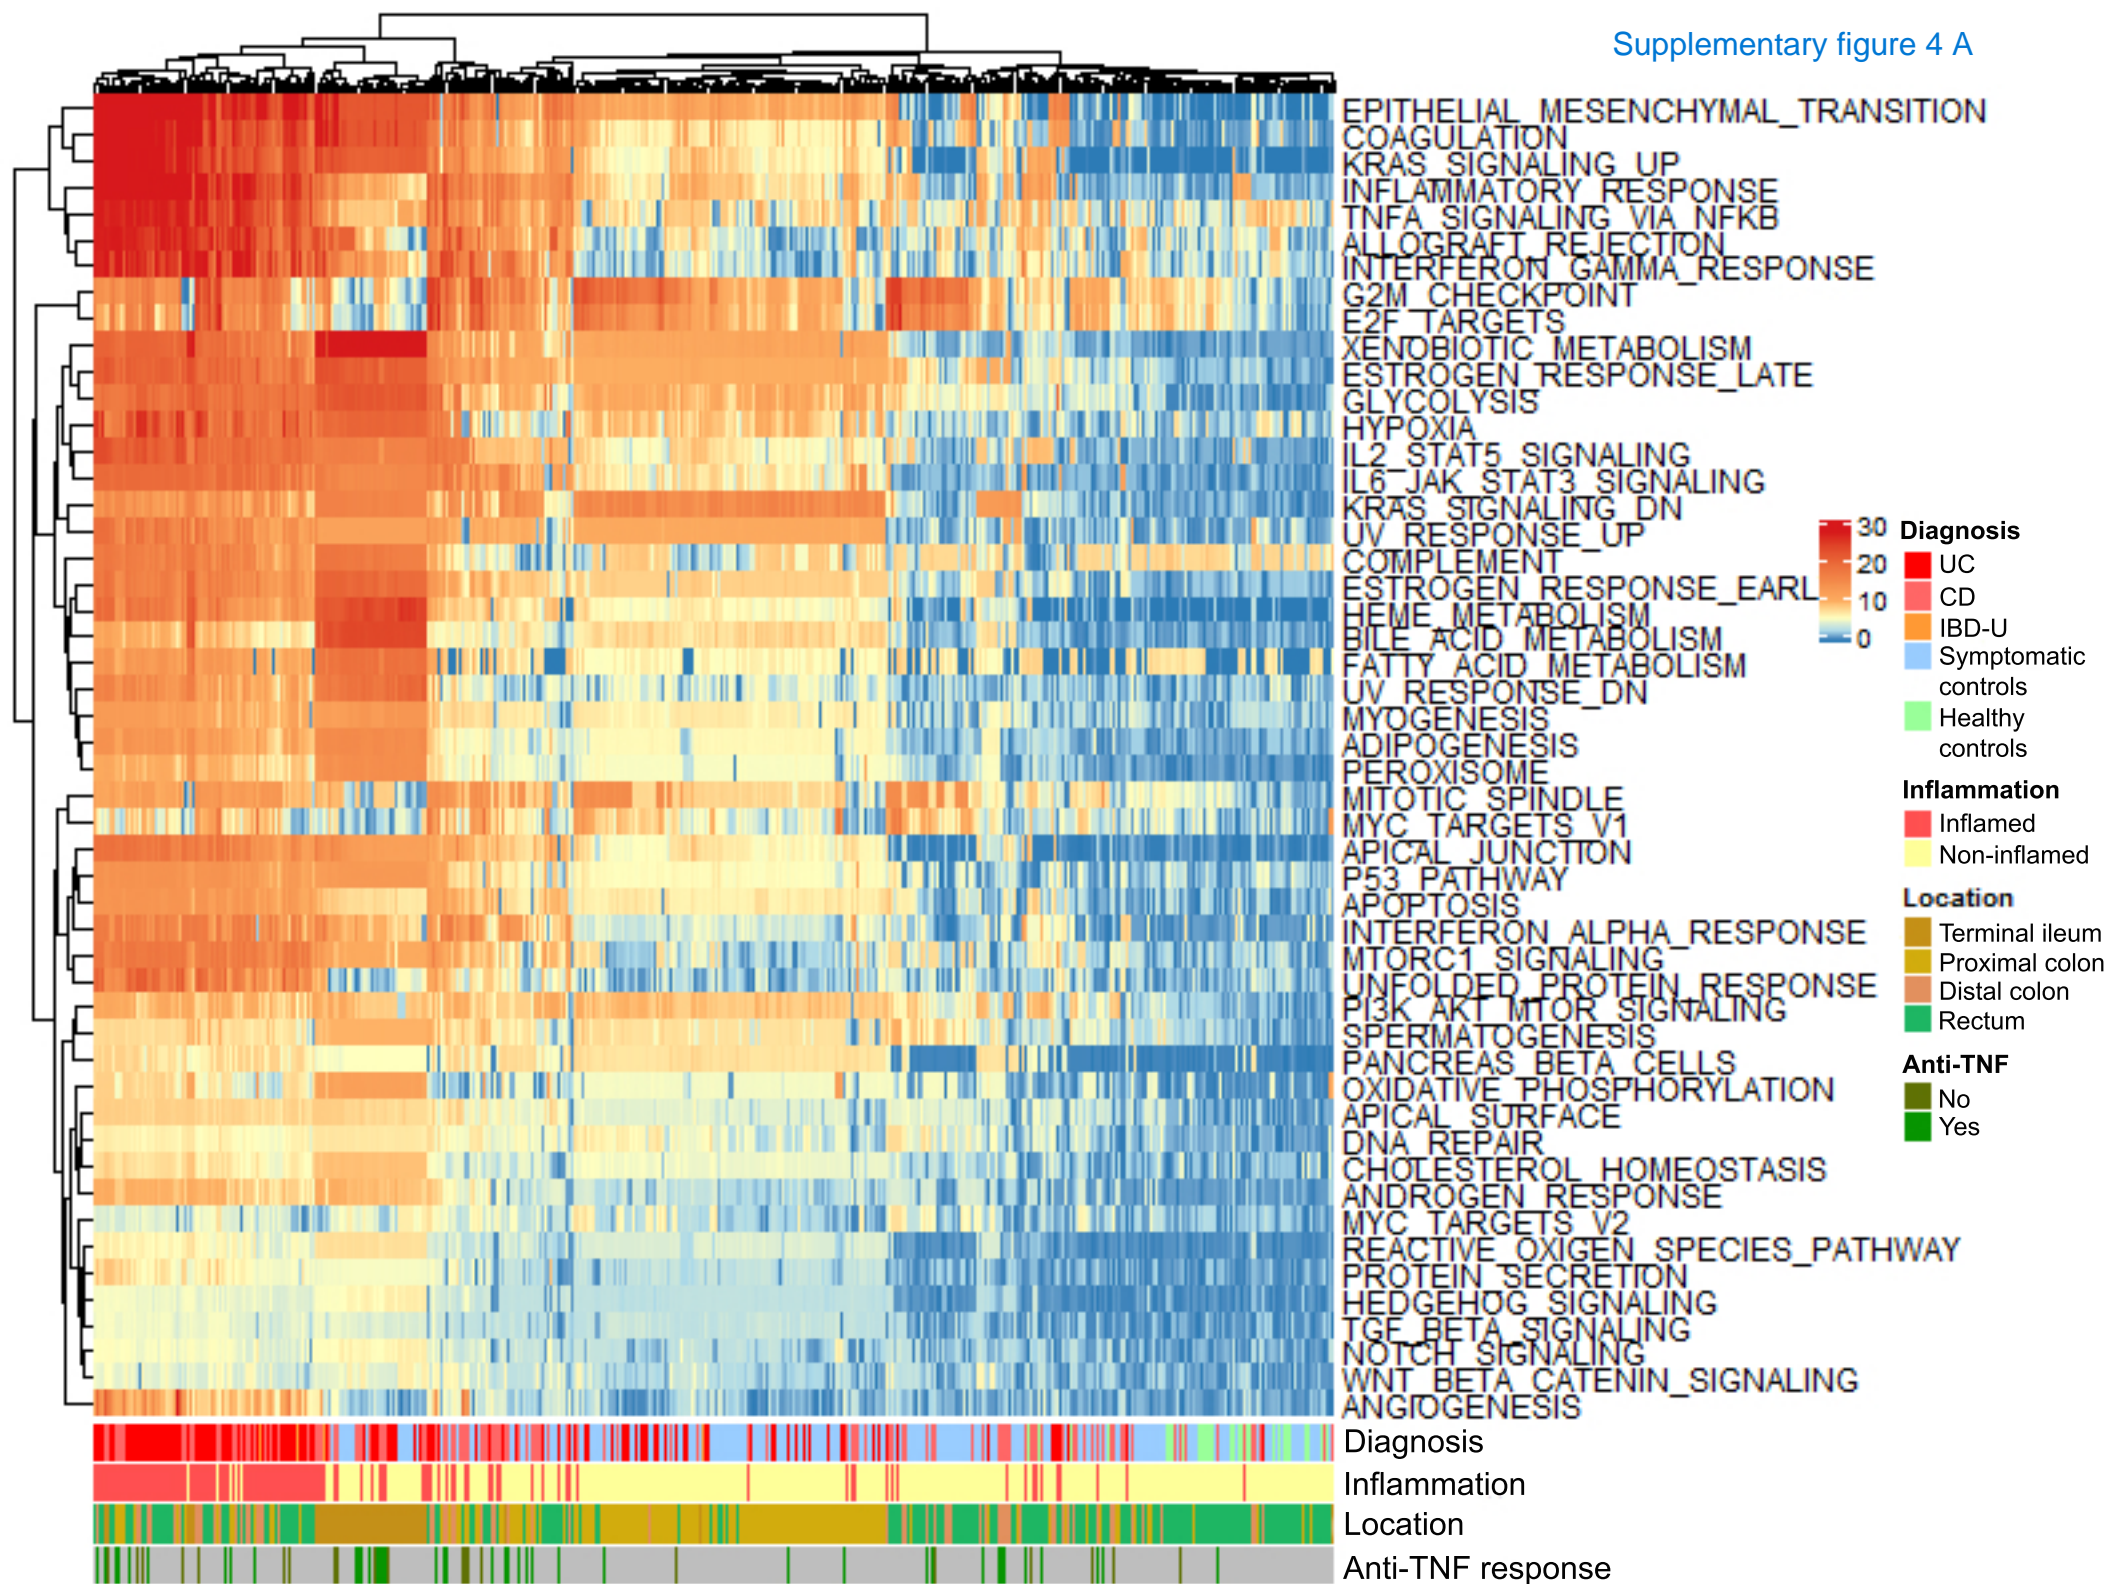

supplementary figure 4B

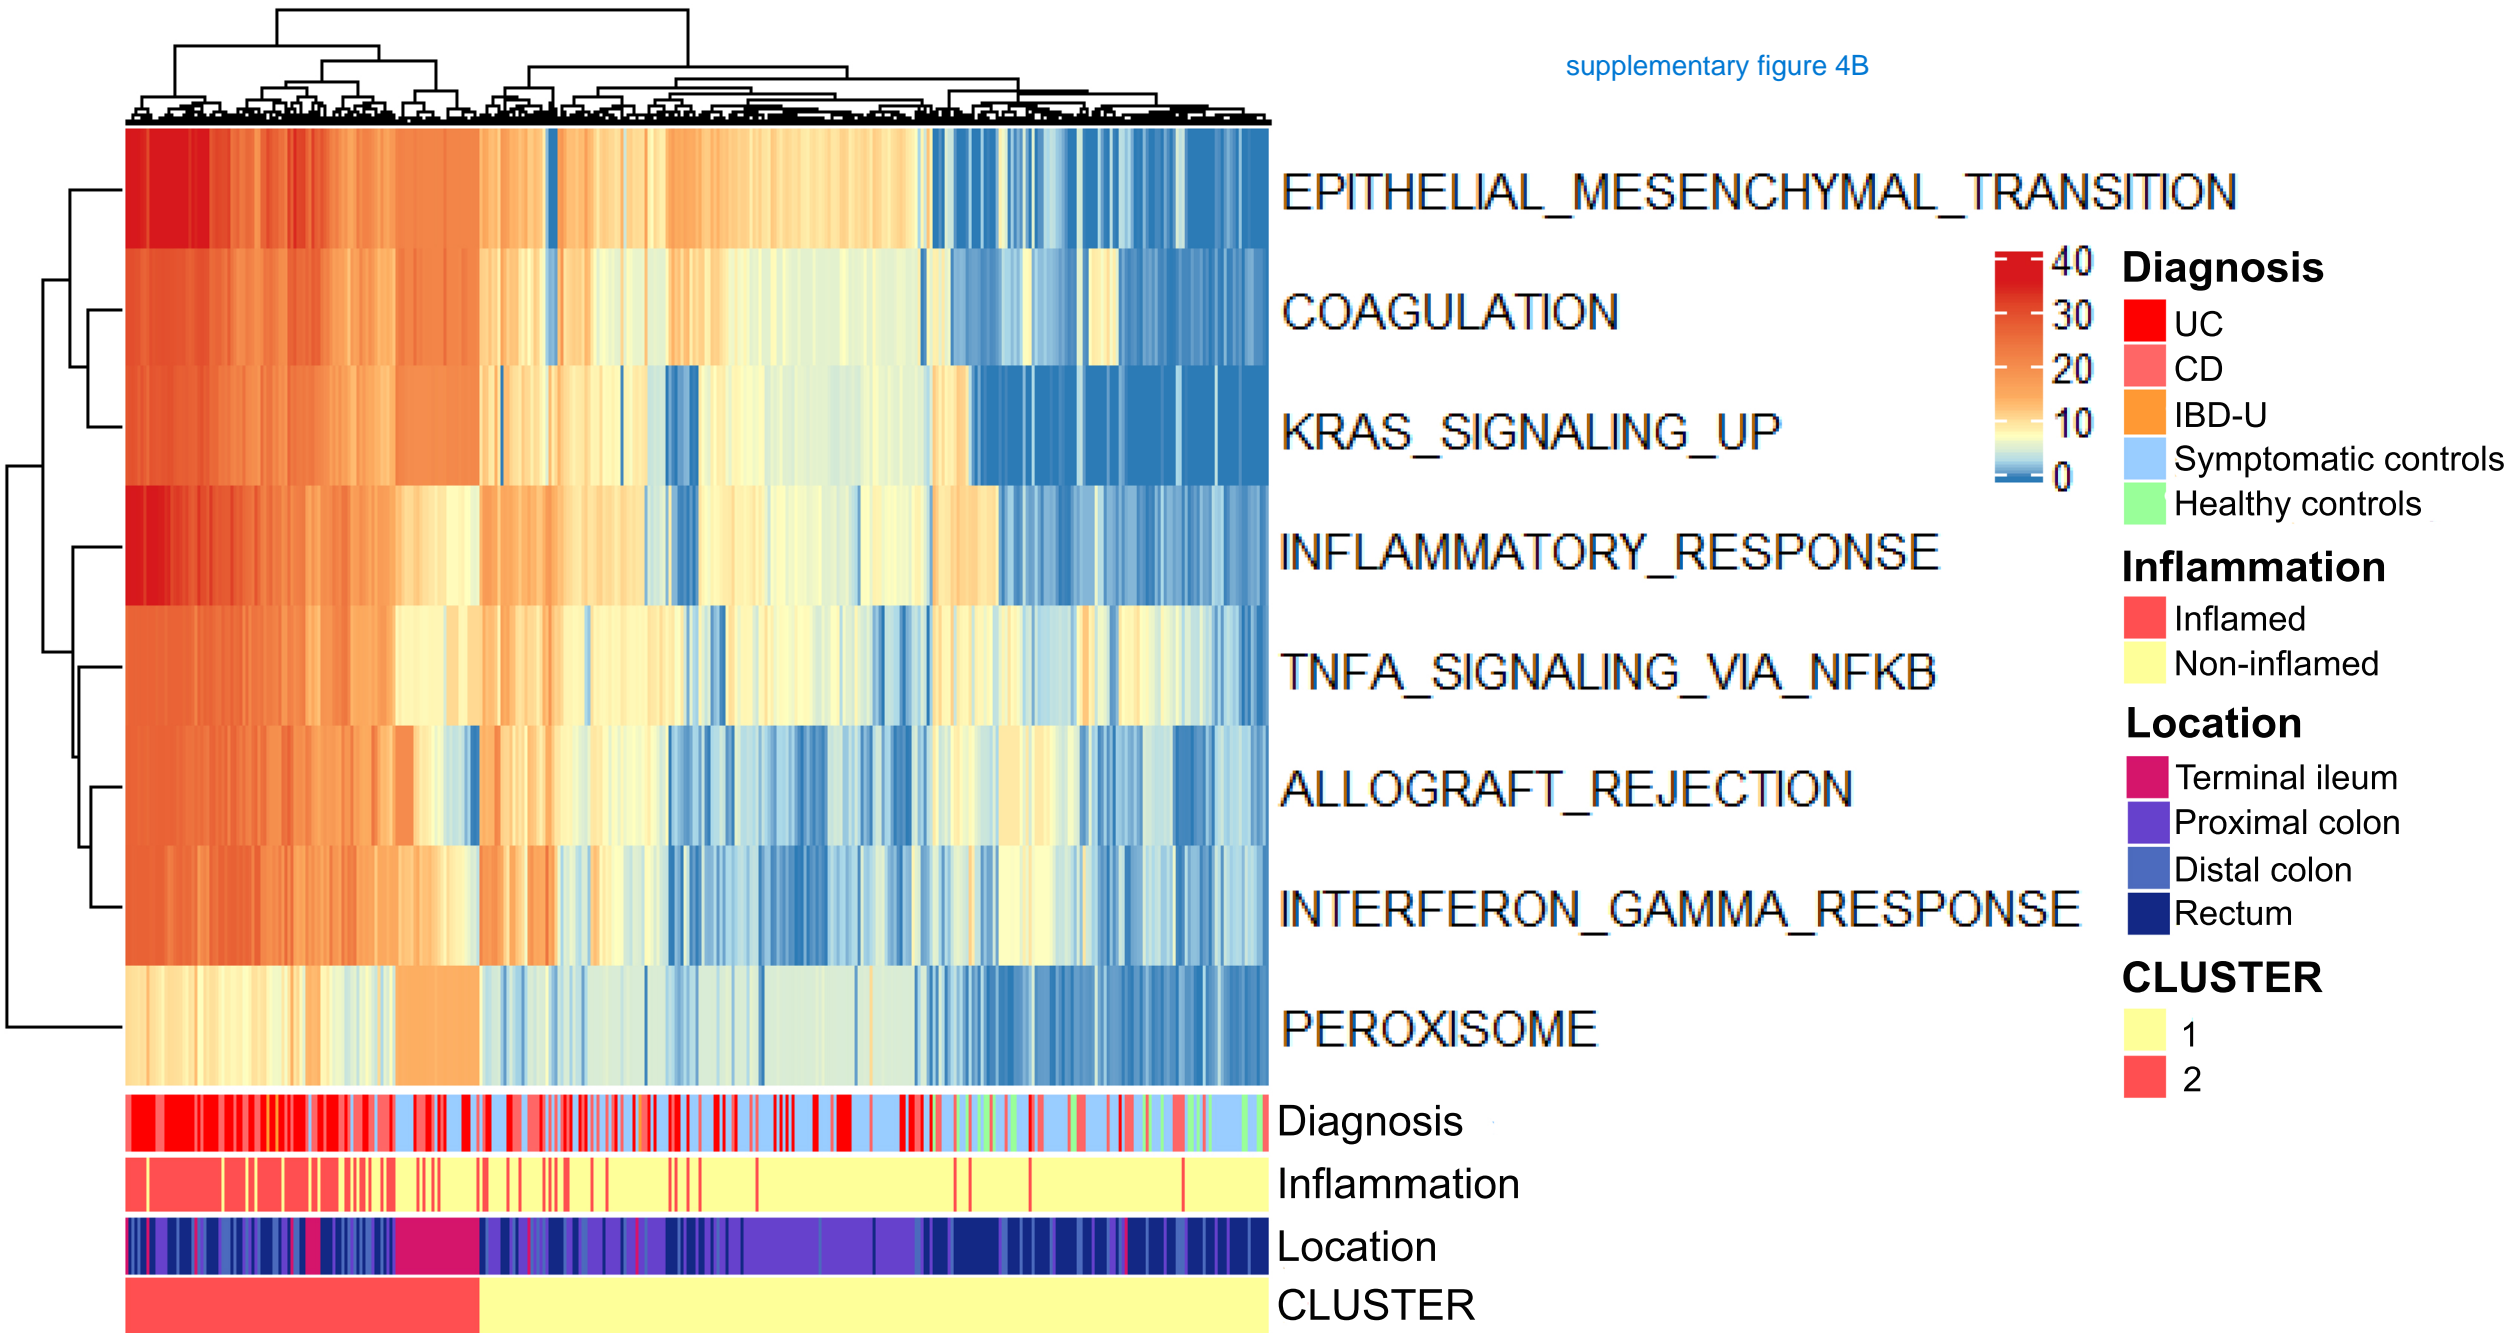

Supplementary figure 4C

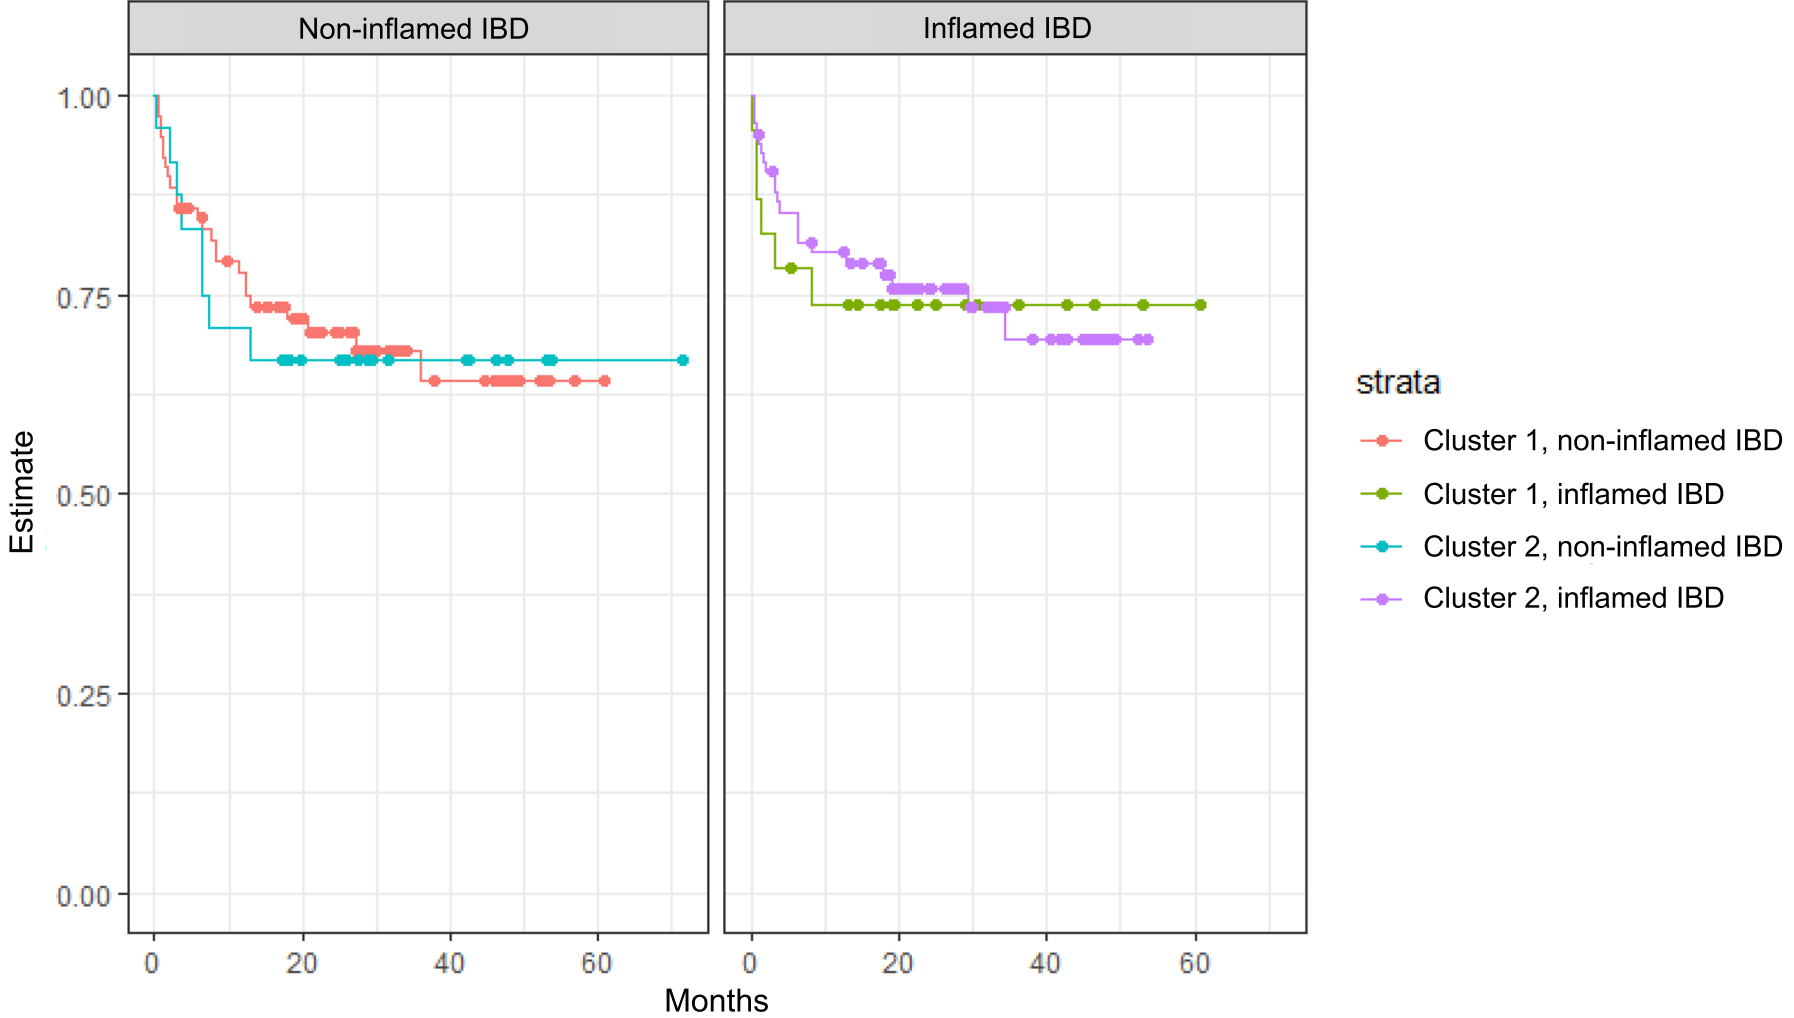



### **Figure Legends to the supplementary figures**

**SUPPL. FIGURE 1:** Samples and raw data. Overview of sample collection. Hierarchical clustering of 40K probes in UC **(A)** and CD **(B)**. **Abbreviations: CD: Crohn`s disease. UC: ulcerative colitis.**

**SUPPL. FIGURE 2:** Gene set enrichment analyses comparing inflamed and non-inflamed samples in **(A)** CD and **(B)** UC. The enriched GO terms are given as Normalized Enrichment Scores (NES) and the top 30 positive NES is demonstrated in top panel (orange) and the top 30 negative NES are demonstrated in bottom panel (blue). **Abbreviations: CDi: Inflamed CD. CDni: Non-inflamed CD. UCi: Inflamed UC. UCni: non-inflamed UC. NES: Normalised Enrichment Score.**

**SUPPL. FIGURE 3:** Predicting time for treatment escalation. **(A)** Differentially expressed genes were extracted from clusters of non-inflamed biopsies from UC (left) and CD (right). Kaplan Meier curves illustrating time until treatment escalation for the identified clusters. There were no significant differences in clinical outcome between patients affiliated to the three clusters (UC ( $p=0.832$ ) and CD ( $p=0.175$ )). **(B)** Differentially expressed genes were extracted from clusters of inflamed biopsies from UC (left) and CD (right). Kaplan Meier curves illustrating time until treatment escalation analyses for the identified clusters. There were no significant differences in clinical outcome between patients affiliated to the three clusters (UC( $p=0.954$ ) and CD ( $p=0.644$ )). **Abbreviations: CD: Crohn`s disease. UC: ulcerative colitis.**

**SUPPL FIGURE 4:** Pathway signature analysis. Hierarchical clustering of curated biological pathways. **(A)** 50 curated pathways giving 5 clusters. **(B)** The visually strongest signal of clustering in the black frame of figure (A), are defined into 2 clusters. **(C)** Kaplan Meyer curves of the 2 clusters in (B), related to time for treatment escalation for IBD-patients. Inflamed and non-inflamed samples from the clusters are analysed separately: Non-inflamed samples ("inflammation\_status\_c" for control/non-inflamed) to the left and inflamed samples (inflammation status\_i" for inflammation) to the right. **Abbreviations: CD: Crohn`s disease. UC: ulcerative colitis. IBD-U: IBD-unclassified.**



**Suppl. table 1:** Baseline characteristics for patients according to treatment escalation status.

\* including one patient who died without having escalated. Abbr.: **Abbreviations:** CD (Crohn's disease), CRP (C-reactive protein, mg/L), F-Calpro (fecal calprotectin mg/kg) IBD\_U (inflammatory bowel disease unclassified), UC (ulcerative colitis)

| Diagnosis |                             | Escalation         | No escalation     |
|-----------|-----------------------------|--------------------|-------------------|
| CD        | N                           | 31                 | 34                |
|           | Age(mean)                   | 24                 | 32                |
|           | CRP median (quartiles)      | 16 (8 - 40)        | 5 (3 - 17)        |
|           | F-Calpro median (quartiles) | 1900 (1406 - 2886) | 531 (290 - 1224)  |
| IBD_U     | N                           | 1                  | 2                 |
|           | Age (mean)                  | 14                 | 40                |
|           | CRP median (quartiles)      | 1 (1 - 1)          | 47 (47 - 47)      |
|           | F-Calpro median (quartiles) | -                  | 612 (612 - 612)   |
| UC        | N                           | 13                 | 67*               |
|           | Age (mean)                  | 28                 | 38                |
|           | CRP median (quartiles)      | 19 (9 - 48)        | 4 (3 - 9)         |
|           | F-Calpro median (quartiles) | 1433 (526 – 6000+) | 1389 (556 - 3057) |





**Suppl. Table 2:** Results from escalation analysis for candidate genes in Lee et al (2017). IBD refers to the combined UC+CD+IBD-U analysis. HR=Hazard ratio; CD (Crohn`s disease), FOXO3 (forkhead box 03), HLA-B (human leucocyte antigen B), IBD (inflammatory bowel disease); IGFBP1 (insulin-like growth factor binding protein 1), IGFBP3 (insulin-like growth factor binding protein 3), UC (ulcerative colitis)

| Diagnosis | Inflammation | GeneName | SystematicName  | HR (95% CI)       | p-value |
|-----------|--------------|----------|-----------------|-------------------|---------|
| CD        | Inflamed     | FOXO3    | NM_001455       | 0.90 (0.1 - 5.7)  | 0,913   |
| CD        | Inflamed     | HLA-B    | NM_005514       | 4.54 (1.0 - 21.0) | 0,053   |
| CD        | Inflamed     | HLA-B    | ENST00000466304 | 0.86 (0.7 - 1.0)  | 0,097   |
| CD        | Inflamed     | IGFBP1   | NM_000596       | 3.30 (0.3 - 38.8) | 0,342   |
| CD        | Inflamed     | IGFBP3   | NM_001013398    | 0.99 (0.5 - 2.0)  | 0,970   |
| CD        | Non-inflamed | FOXO3    | NM_001455       | 0.92 (0.2 - 3.4)  | 0,906   |
| CD        | Non-inflamed | HLA-B    | NM_005514       | 1.51 (0.6 - 3.6)  | 0,354   |
| CD        | Non-inflamed | HLA-B    | ENST00000466304 | 0.83 (0.7 - 1.0)  | 0,087   |
| CD        | Non-inflamed | IGFBP1   | NM_000596       | 0.13 (0.0 - 1.0)  | 0,045   |
| CD        | Non-inflamed | IGFBP3   | NM_001013398    | 1.47 (0.8 - 2.6)  | 0,198   |
| UC        | Inflamed     | FOXO3    | NM_001455       | 1.36 (0.1 - 15.6) | 0,803   |
| UC        | Inflamed     | HLA-B    | NM_005514       | 0.64 (0.1 - 3.1)  | 0,580   |
| UC        | Inflamed     | HLA-B    | ENST00000466304 | 0.87 (0.6 - 1.2)  | 0,443   |
| UC        | Inflamed     | IGFBP1   | NM_000596       | 8.60 (1.0 - 70.7) | 0,045   |
| UC        | Inflamed     | IGFBP3   | NM_001013398    | 1.63 (0.9 - 3.1)  | 0,139   |
| UC        | Non-inflamed | FOXO3    | NM_001455       | 1.54 (0.1 - 33.3) | 0,782   |
| UC        | Non-inflamed | HLA-B    | NM_005514       | 3.04 (0.3 - 26.4) | 0,313   |
| UC        | Non-inflamed | HLA-B    | ENST00000466304 | 1.76 (0.7 - 4.4)  | 0,227   |
| UC        | Non-inflamed | IGFBP1   | NM_000596       | 0.50 (0.0 - 25.4) | 0,728   |
| UC        | Non-inflamed | IGFBP3   | NM_001013398    | 1.22 (0.3 - 5.1)  | 0,784   |
| IBD       | Inflamed     | FOXO3    | NM_001455       | 1.22 (0.3 - 5.0)  | 0,786   |
| IBD       | Inflamed     | HLA-B    | NM_005514       | 1.73 (0.6 - 5.0)  | 0,312   |
| IBD       | Inflamed     | HLA-B    | ENST00000466304 | 0.86 (0.7 - 1.0)  | 0,075   |
| IBD       | Inflamed     | IGFBP1   | NM_000596       | 3.36 (0.7 - 15.3) | 0,116   |
| IBD       | Inflamed     | IGFBP3   | NM_001013398    | 1.22 (0.8 - 1.9)  | 0,366   |
| IBD       | Non-inflamed | FOXO3    | NM_001455       | 1.51 (0.5 - 5.0)  | 0,498   |
| IBD       | Non-inflamed | HLA-B    | NM_005514       | 1.91 (0.9 - 4.2)  | 0,112   |
| IBD       | Non-inflamed | HLA-B    | ENST00000466304 | 0.96 (0.8 - 1.2)  | 0,756   |
| IBD       | Non-inflamed | IGFBP1   | NM_000596       | 0.49 (0.1 - 2.5)  | 0,389   |
| IBD       | Non-inflamed | IGFBP3   | NM_001013398    | 1.70 (1.0 - 3.0)  | 0,058   |
